# Supplementary material
Source: PubMed Central journal article supplement (PMC5286212)
Supplement: jeehp-13-40-app.pdf [file jeehp-13-40-app.pdf]

**Appendix 1.** Methodological quality assessed based on the Newcastle-Ottawa quality assessment scale available from: [http://www.ohri.ca/programs/clinical\\_epidemiology/nosgen.pdf](http://www.ohri.ca/programs/clinical_epidemiology/nosgen.pdf) [cited 2016 Oct 2] (Posting of the scale was permitted by Professor GA Wells, Department of Epidemiology and Community Medicine, University of Ottawa, Ottawa, ON, Canada).

## NEWCASTLE-OTTAWA QUALITY ASSESSMENT SCALE COHORT STUDIES

Note: A study can be awarded a maximum of one star (\*) for each numbered item within the 'Selection' and 'Outcome' categories. A maximum of two stars can be given for 'Comparability'

### 1. Selection

- 1) Representativeness of the exposed cohort
  - a) Truly representative of the average \_\_\_\_\_ (describe) in the community\*
  - b) Somewhat representative of the average \_\_\_\_\_ in the community\*
  - c) Selected group of users (eg., nurses, volunteers)
  - d) No description of the derivation of the cohort
- 2) Selection of the non-exposed cohort
  - a) Drawn from the same community as the exposed cohort\*
  - b) Drawn from a different source
  - c) No description of the derivation of the non-exposed cohort
- 3) Ascertainment of exposure
  - a) Secure record (eg., surgical records)\*
  - b) Structured interview\*
  - c) Written self-report
  - d) No description
- 4) Demonstration that outcome of interest was not present at start of study
  - a) Yes\*
  - b) No

### 2. Comparability

- 1) Comparability of cohorts on the basis of the design or analysis
  - a) Study controls for \_\_\_\_\_ (select the most important factor)\*
  - b) Study controls for any additional factor\* (This criteria could be modified to indicate specific control for a second important factor.)

### 3. Outcome

- 1) Assessment of outcome
  - a) Independent blind assessment\*
  - b) Record linkage\*
  - c) Self report
  - d) No description
- 2) Was follow-up long enough for outcomes to occur
  - a) Yes (select an adequate follow-up period for outcome of interest)\*
  - b) No
- 3) Adequacy of follow-up of cohorts
  - a) Complete follow-up—all subjects accounted for\*
  - b) Subjects lost to follow-up unlikely to introduce bias - small number lost - > \_\_\_\_% (select an adequate %) follow-up, or description provided of those lost)\*
  - c) Follow-up rate < \_\_\_\_% (select an adequate %) and no description of those lost
  - d) No statement
